# Supplementary material
Source: HighWire-hosted journal article supplement (https://hw-f5-jim.highwire.org/content/69/5/1035)
Supplement: inline-supplementary-material-1 [file inline-supplementary-material-1.pdf]

**SUPPLEMENTAL - SENSITIVITY ANALYSES****I. EXCLUDING IMPUTATIONS**

Description: Listwise deletion of 101 cases with imputed data

**a. Incidence of Renal Outcomes According to Follow-up Systolic Blood Pressure**

| Follow-up SBP — mmHg | No. of patients | CKD progression — no. (%) | ≥ 50% reduction in GFR — no. (%) | ESRD or transplant — no. (%) |
|----------------------|-----------------|---------------------------|----------------------------------|------------------------------|
| <110                 | 179             | 18 (10.1)                 | 16 (8.9)                         | 9 (5.0)                      |
| 110-119              | 933             | 67 (7.2)                  | 52 (5.6)                         | 35 (3.8)                     |
| 120-129              | 1265            | 158 (12.5)                | 136 (10.8)                       | 86 (6.8)                     |
| 130-139              | 1398            | 187 (13.4)                | 136 (9.7)                        | 128 (9.2)                    |
| 140-149              | 767             | 145 (18.9)                | 115 (15.0)                       | 98 (12.8)                    |
| ≥150                 | 358             | 126 (35.2)                | 89 (24.9)                        | 98 (27.4)                    |
| Total                | 4900            | 701 (14.3)                | 544 (11.1)                       | 454 (9.3)                    |

**b. Risk of Chronic Kidney Disease Progression According to Follow-up Systolic Blood Pressure**

| Follow-up SBP — mmHg | Unadjusted HR (95% CI) | Adjusted HR (95% CI) | P value |
|----------------------|------------------------|----------------------|---------|
| <110                 | 1.3 (0.77–2.19)        | 1.74 (1.02–2.95)     | 0.041   |
| 110-119              | 1                      | 1                    | (ref)   |
| 120-129              | 1.86 (1.4–2.47)        | 1.36 (1.01–1.82)     | 0.041   |
| 130-139              | 2.03 (1.53–2.68)       | 1.66 (1.22–2.27)     | 0.001   |
| 140-149              | 2.92 (2.19–3.9)        | 2.02 (1.43–2.84)     | <0.001  |
| ≥150                 | 7.01 (5.21–9.43)       | 2.97 (1.98–4.46)     | <0.001  |

Adjustments: Age, Female, Race, BMI, DM, CVD, Smoking status, Baseline GFR, Albuminuria/Proteinuria category, Baseline SBP, Baseline DBP, Time-updated SBP, Time-updated DBP, Number of agents, ACEI/ARB use, CCB use, Diuretic use (at baseline and trial start)

**c. Risk of Chronic Kidney Disease Progression According to Baseline Albuminuria or Proteinuria**

| Albuminuria / Proteinuria category | Unadjusted HR (95% CI) | Adjusted HR (95% CI) | P value |
|------------------------------------|------------------------|----------------------|---------|
| Normal to mildly increased (A1)    | 1                      | 1                    | (ref)   |
| Moderately increased (A2)          | 1.85 (1.46–2.34)       | 1.49 (1.16–1.91)     | 0.002   |
| Severely increased (A3)            | 11.29 (9.4–13.57)      | 3.08 (2.48–3.82)     | <0.001  |

Adjustments: Age, Female, Race, BMI, DM, CVD, Smoking status, Baseline GFR, Baseline SBP, Baseline DBP, Time-updated SBP, Time-updated DBP, Number of agents, ACEI/ARB use, CCB use, Diuretic use (at baseline and trial start)

**d. Interaction testing**

| Interaction                                         | P Value |
|-----------------------------------------------------|---------|
| Follow-up SBP*A2 (vs. A1) albuminuria / proteinuria | 0.027   |
| Follow-up SBP*A3 (vs. A1) albuminuria / proteinuria | 0.001   |

Adjustments: Age, Female, Race, BMI, DM, CVD, Smoking status, Baseline GFR, Albuminuria/proteinuria category, Follow-up SBP, Baseline SBP, Baseline DBP, Time-updated SBP, Time-updated DBP, Number of agents, ACEI/ARB use, CCB use, Diuretic use (at baseline and trial start)

**e. Risk of Chronic Kidney Disease Progression in Subgroups of Baseline Albuminuria or Proteinuria**

| Albuminuria / Proteinuria category | Follow-up SBP — mmHg | Adjusted HR (95% CI) | P value |
|------------------------------------|----------------------|----------------------|---------|
| Normal to mildly increased (A1)    | <110                 | 1.67 (0.66–4.22)     | 0.275   |
|                                    | 110-119              | 1                    | (ref)   |
|                                    | 120-129              | 1.48 (0.88–2.49)     | 0.137   |
|                                    | 130-139              | 0.89 (0.49–1.62)     | 0.706   |
|                                    | 140-149              | 0.81 (0.4–1.65)      | 0.566   |
|                                    | >150                 | 1.29 (0.55–3.01)     | 0.554   |
| Moderately increased (A2)          | <110                 | 0.94 (0.26–3.44)     | 0.927   |
|                                    | 110-119              | 1                    | (ref)   |
|                                    | 120-129              | 0.75 (0.36–1.54)     | 0.433   |
|                                    | 130-139              | 1.79 (0.87–3.71)     | 0.115   |
|                                    | 140-149              | 1.82 (0.81–4.11)     | 0.148   |
|                                    | >150                 | 1.76 (0.61–5.12)     | 0.296   |
| Severely increased (A3)            | <110                 | 2.19 (1.02–4.7)      | 0.044   |
|                                    | 110-119              | 1                    | (ref)   |
|                                    | 120-129              | 1.54 (1.01–2.34)     | 0.046   |
|                                    | 130-139              | 2.29 (1.48–3.54)     | <0.001  |
|                                    | 140-149              | 3.33 (2.07–5.37)     | <0.001  |
|                                    | >150                 | 5.23 (3.03–9.01)     | <0.001  |

Adjustments: Age, Female, Race, BMI, DM, CVD, Smoking status, Baseline GFR, Albuminuria/Proteinuria category, Baseline SBP, Baseline DBP, Time-updated SBP, Time-updated DBP, Number of agents, ACEI/ARB use, CCB use, Diuretic use (at baseline and trial start)

## II. EXCLUDING DIABETES

Description: Listwise deletion of 43 cases with diabetes

### a. Incidence of Renal Outcomes According to Follow-up Systolic Blood Pressure

| Follow-up SBP — mmHg | No. of patients | CKD progression — no. (%) | ≥ 50% reduction in GFR — no. (%) | ESRD or transplant — no. (%) |
|----------------------|-----------------|---------------------------|----------------------------------|------------------------------|
| <110                 | 183             | 18 (9.8%)                 | 16 (8.7%)                        | 9 (4.9%)                     |
| 110-119              | 947             | 68 (7.2%)                 | 53 (5.6%)                        | 36 (3.8%)                    |
| 120-129              | 1275            | 158 (12.4%)               | 135 (10.6%)                      | 86 (6.7%)                    |
| 130-139              | 1417            | 188 (13.3%)               | 137 (9.7%)                       | 129 (9.1%)                   |
| 140-149              | 772             | 144 (18.7%)               | 114 (14.8%)                      | 97 (12.6%)                   |
| ≥150                 | 364             | 115 (31.6%)               | 77 (21.2%)                       | 92 (25.3%)                   |
| Total                | 4958            | 691 (13.9%)               | 532 (10.7%)                      | 449 (9.1%)                   |

### b. Risk of Chronic Kidney Disease Progression According to Follow-up Systolic Blood Pressure

| Follow-up SBP — mmHg | Unadjusted HR (95% CI) | Adjusted HR (95% CI) | P value |
|----------------------|------------------------|----------------------|---------|
| <110                 | 1.29 (0.77–2.17)       | 1.73 (1.02–2.94)     | 0.041   |
| 110-119              | 1                      | 1                    | (ref)   |
| 120-129              | 1.84 (1.39–2.45)       | 1.37 (1.02–1.83)     | 0.034   |
| 130-139              | 2.01 (1.53–2.66)       | 1.68 (1.24–2.29)     | 0.001   |
| 140-149              | 2.88 (2.16–3.85)       | 2.08 (1.47–2.93)     | <0.001  |
| ≥150                 | 6.4 (4.74–8.64)        | 2.95 (1.96–4.44)     | <0.001  |

Adjustments: Age, Female, Race, BMI, DM, CVD, Smoking status, Baseline GFR, Albuminuria/Proteinuria category, Baseline SBP, Baseline DBP, Time-updated SBP, Time-updated DBP, Number of agents, ACEI/ARB use, CCB use, Diuretic use (at baseline and trial start)

### c. Risk of Chronic Kidney Disease Progression According to Baseline Albuminuria or Proteinuria

| Albuminuria / Proteinuria category | Unadjusted HR (95% CI) | Adjusted HR (95% CI) | P value |
|------------------------------------|------------------------|----------------------|---------|
| Normal to mildly increased (A1)    | 1                      | 1                    | (ref)   |
| Moderately increased (A2)          | 1.85 (1.46–2.34)       | 1.52 (1.18–1.95)     | 0.001   |
| Severely increased (A3)            | 11.27 (9.37–13.56)     | 3.08 (2.48–3.83)     | <0.001  |

Adjustments: Age, Female, Race, BMI, DM, CVD, Smoking status, Baseline GFR, Baseline SBP, Baseline DBP, Time-updated SBP, Time-updated DBP, Number of agents, ACEI/ARB use, CCB use, Diuretic use (at baseline and trial start)

**d. Interaction testing**

| Interaction                                         | P Value |
|-----------------------------------------------------|---------|
| Follow-up SBP*A2 (vs. A1) albuminuria / proteinuria | 0.019   |
| Follow-up SBP*A3 (vs. A1) albuminuria / proteinuria | 0.001   |

Adjustments: Age, Female, Race, BMI, DM, CVD, Smoking status, Baseline GFR, Albuminuria/proteinuria category, Follow-up SBP, Baseline SBP, Baseline DBP, Time-updated SBP, Time-updated DBP, Number of agents, ACEI/ARB use, CCB use, Diuretic use (at baseline and trial start)

**e. Risk of Chronic Kidney Disease Progression in Subgroups of Baseline Albuminuria or Proteinuria**

| Albuminuria / Proteinuria category | Follow-up SBP — mmHg | Adjusted HR (95% CI) | P value |
|------------------------------------|----------------------|----------------------|---------|
| Normal to mildly increased (A1)    | <110                 | 1.7 (0.67–4.28)      | 0.262   |
|                                    | 110-119              | 1                    | (ref)   |
|                                    | 120-129              | 1.45 (0.86–2.44)     | 0.162   |
|                                    | 130-139              | 0.89 (0.49–1.62)     | 0.702   |
|                                    | 140-149              | 0.84 (0.41–1.69)     | 0.618   |
|                                    | >150                 | 1.24 (0.53–2.91)     | 0.621   |
| Moderately increased (A2)          | <110                 | 0.96 (0.26–3.49)     | 0.945   |
|                                    | 110-119              | 1                    | (ref)   |
|                                    | 120-129              | 0.77 (0.37–1.58)     | 0.467   |
|                                    | 130-139              | 1.88 (0.91–3.89)     | 0.089   |
|                                    | 140-149              | 2 (0.89–4.51)        | 0.093   |
|                                    | >150                 | 1.96 (0.68–5.67)     | 0.216   |
| Severely increased (A3)            | <110                 | 2.15 (1–4.6)         | 0.049   |
|                                    | 110-119              | 1                    | (ref)   |
|                                    | 120-129              | 1.57 (1.03–2.38)     | 0.034   |
|                                    | 130-139              | 2.32 (1.51–3.57)     | <0.001  |
|                                    | 140-149              | 3.34 (2.08–5.38)     | <0.001  |
|                                    | >150                 | 5.16 (2.99–8.91)     | <0.001  |

Adjustments: Age, Female, Race, BMI, DM, CVD, Smoking status, Baseline GFR, Albuminuria/Proteinuria category, Baseline SBP, Baseline DBP, Time-updated SBP, Time-updated DBP, Number of agents, ACEI/ARB use, CCB use, Diuretic use (at baseline and trial start)

### III. EXCLUDING HALT-PKD TRIAL

Description: Listwise deletion of 178 cases from HALT-PKD trial

#### a. Incidence of Renal Outcomes According to Follow-up Systolic Blood Pressure

| Follow-up SBP — mmHg | No. of patients | CKD progression — no. (%) | ≥ 50% reduction in GFR — no. (%) | ESRD or transplant — no. (%) |
|----------------------|-----------------|---------------------------|----------------------------------|------------------------------|
| <110                 | 135             | 18 (13.3%)                | 16 (11.9%)                       | 9 (6.7%)                     |
| 110-119              | 883             | 68 (7.7%)                 | 53 (6.0%)                        | 36 (4.1%)                    |
| 120-129              | 1236            | 158 (12.8%)               | 136 (11.0%)                      | 86 (7.0%)                    |
| 130-139              | 1413            | 191 (13.5%)               | 140 (9.9%)                       | 130 (9.2%)                   |
| 140-149              | 778             | 148 (19.0%)               | 118 (15.2%)                      | 100 (12.9%)                  |
| ≥150                 | 378             | 129 (34.1%)               | 90 (23.8%)                       | 100 (26.5%)                  |
| Total                | 4823            | 712 (14.8%)               | 553 (11.5%)                      | 461 (9.6%)                   |

#### b. Risk of Chronic Kidney Disease Progression According to Follow-up Systolic Blood Pressure

| Follow-up SBP — mmHg | Unadjusted HR (95% CI) | Adjusted HR (95% CI) | P value |
|----------------------|------------------------|----------------------|---------|
| <110                 | 2.05 (1.22–3.45)       | 1.76 (1.04–2.99)     | 0.035   |
| 110-119              | 1                      | 1                    | (ref)   |
| 120-129              | 1.71 (1.29–2.27)       | 1.34 (1–1.79)        | 0.049   |
| 130-139              | 1.79 (1.36–2.37)       | 1.66 (1.22–2.26)     | 0.001   |
| 140-149              | 2.56 (1.92–3.41)       | 2.03 (1.44–2.85)     | <0.001  |
| ≥150                 | 6.08 (4.53–8.16)       | 3.01 (2.01–4.5)      | <0.001  |

Adjustments: Age, Female, Race, BMI, DM, CVD, Smoking status, Baseline GFR, Albuminuria/Proteinuria category, Baseline SBP, Baseline DBP, Time-updated SBP, Time-updated DBP, Number of agents, ACEI/ARB use, CCB use, Diuretic use (at baseline and trial start)

#### c. Risk of Chronic Kidney Disease Progression According to Baseline Albuminuria or Proteinuria

| Albuminuria / Proteinuria category | Unadjusted HR (95% CI) | Adjusted HR (95% CI) | P value |
|------------------------------------|------------------------|----------------------|---------|
| Normal to mildly increased (A1)    | 1                      | 1                    | (ref)   |
| Moderately increased (A2)          | 2.4 (1.9–3.04)         | 1.5 (1.17–1.92)      | 0.001   |
| Severely increased (A3)            | 11.65 (9.7–14)         | 3.08 (2.49–3.82)     | <0.001  |

Adjustments: Age, Female, Race, BMI, DM, CVD, Smoking status, Baseline GFR, Baseline SBP, Baseline DBP, Time-updated SBP, Time-updated DBP, Number of agents, ACEI/ARB use, CCB use, Diuretic use (at baseline and trial start)

**d. Interaction testing**

| Interaction                                         | P Value |
|-----------------------------------------------------|---------|
| Follow-up SBP*A2 (vs. A1) albuminuria / proteinuria | 0.017   |
| Follow-up SBP*A3 (vs. A1) albuminuria / proteinuria | 0.001   |

Adjustments: Age, Female, Race, BMI, DM, CVD, Smoking status, Baseline GFR, Albuminuria/proteinuria category, Follow-up SBP, Baseline SBP, Baseline DBP, Time-updated SBP, Time-updated DBP, Number of agents, ACEI/ARB use, CCB use, Diuretic use (at baseline and trial start)

**e. Risk of Chronic Kidney Disease Progression in Subgroups of Baseline Albuminuria or Proteinuria**

| Albuminuria / Proteinuria category | Follow-up SBP — mmHg | Adjusted HR (95% CI) | P value |
|------------------------------------|----------------------|----------------------|---------|
| Normal to mildly increased (A1)    | <110                 | 1.68 (0.66–4.22)     | 0.275   |
|                                    | 110-119              | 1                    | (ref)   |
|                                    | 120-129              | 1.48 (0.88–2.49)     | 0.138   |
|                                    | 130-139              | 0.89 (0.49–1.62)     | 0.706   |
|                                    | 140-149              | 0.81 (0.4–1.65)      | 0.566   |
|                                    | >150                 | 1.29 (0.55–3.01)     | 0.555   |
| Moderately increased (A2)          | <110                 | 0.99 (0.27–3.6)      | 0.986   |
|                                    | 110-119              | 1                    | (ref)   |
|                                    | 120-129              | 0.71 (0.34–1.46)     | 0.352   |
|                                    | 130-139              | 1.78 (0.87–3.67)     | 0.117   |
|                                    | 140-149              | 1.82 (0.81–4.08)     | 0.148   |
|                                    | >150                 | 1.96 (0.69–5.58)     | 0.209   |
| Severely increased (A3)            | <110                 | 2.2 (1.03–4.69)      | 0.042   |
|                                    | 110-119              | 1                    | (ref)   |
|                                    | 120-129              | 1.52 (1–2.31)        | 0.048   |
|                                    | 130-139              | 2.28 (1.49–3.51)     | <0.001  |
|                                    | 140-149              | 3.35 (2.09–5.36)     | <0.001  |
|                                    | >150                 | 5.2 (3.04–8.9)       | <0.001  |

Adjustments: Age, Female, Race, BMI, DM, CVD, Smoking status, Baseline GFR, Albuminuria/Proteinuria category, Baseline SBP, Baseline DBP, Time-updated SBP, Time-updated DBP, Number of agents, ACEI/ARB use, CCB use, Diuretic use (at baseline and trial start)

#### IV. GOAL BP AS MEAN FOLLOW-UP BP AFTER 12 MONTHS

Description: BP intervention groups defined using mean of follow-up BP readings at or beyond 12 months

##### a. Incidence of Renal Outcomes According to Follow-up Systolic Blood Pressure

| Follow-up SBP — mmHg | No. of patients | CKD progression — no. (%) | ≥ 50% reduction in GFR — no. (%) | ESRD or transplant — no. (%) |
|----------------------|-----------------|---------------------------|----------------------------------|------------------------------|
| <110                 | 212             | 10 (4.7%)                 | 17 (8.0%)                        | 10 (4.7%)                    |
| 110-119              | 979             | 43 (4.4%)                 | 62 (6.3%)                        | 43 (4.4%)                    |
| 120-129              | 1247            | 86 (6.9%)                 | 122 (9.8%)                       | 86 (6.9%)                    |
| 130-139              | 1317            | 115 (8.7%)                | 135 (10.3%)                      | 115 (8.7%)                   |
| 140-149              | 812             | 101 (12.4%)               | 120 (14.8%)                      | 101 (12.4%)                  |
| ≥150                 | 434             | 107 (24.7%)               | 97 (22.4%)                       | 107 (24.7%)                  |
| Total                | 5001            | 462 (9.2%)                | 553 (11.1%)                      | 462 (9.2%)                   |

##### b. Risk of Chronic Kidney Disease Progression According to Follow-up Systolic Blood Pressure

| Follow-up SBP — mmHg | Unadjusted HR (95% CI) | Adjusted HR (95% CI) | P value |
|----------------------|------------------------|----------------------|---------|
| <110                 | 1.15 (0.7–1.88)        | 1.38 (0.84–2.28)     | 0.206   |
| 110-119              | 1                      | 1                    | (ref)   |
| 120-129              | 1.61 (1.23–2.12)       | 1.17 (0.88–1.55)     | 0.273   |
| 130-139              | 1.88 (1.44–2.46)       | 1.35 (1.01–1.8)      | 0.043   |
| 140-149              | 2.55 (1.94–3.36)       | 1.69 (1.22–2.32)     | 0.001   |
| ≥150                 | 5.96 (4.51–7.88)       | 2.21 (1.53–3.2)      | <0.001  |

Adjustments: Age, Female, Race, BMI, DM, CVD, Smoking status, Baseline GFR, Albuminuria/Proteinuria category, Baseline SBP, Baseline DBP, Time-updated SBP, Time-updated DBP, Number of agents, ACEI/ARB use, CCB use, Diuretic use (at baseline and trial start)

##### c. Risk of Chronic Kidney Disease Progression According to Baseline Albuminuria or Proteinuria

| Albuminuria / Proteinuria category | Unadjusted HR (95% CI) | Adjusted HR (95% CI) | P value |
|------------------------------------|------------------------|----------------------|---------|
| Normal to mildly increased (A1)    | 1                      | 1                    | (ref)   |
| Moderately increased (A2)          | 1.85 (1.46–2.34)       | 1.51 (1.17–1.93)     | 0.001   |
| Severely increased (A3)            | 11.43 (9.51–13.72)     | 3.09 (2.49–3.83)     | <0.001  |

Adjustments: Age, Female, Race, BMI, DM, CVD, Smoking status, Baseline GFR, Baseline SBP, Baseline DBP, Time-updated SBP, Time-updated DBP, Number of agents, ACEI/ARB use, CCB use, Diuretic use (at baseline and trial start)

**d. Interaction testing**

| Interaction                                         | P Value |
|-----------------------------------------------------|---------|
| Follow-up SBP*A2 (vs. A1) albuminuria / proteinuria | 0.053   |
| Follow-up SBP*A3 (vs. A1) albuminuria / proteinuria | 0.001   |

Adjustments: Age, Female, Race, BMI, DM, CVD, Smoking status, Baseline GFR, Albuminuria/proteinuria category, Follow-up SBP, Baseline SBP, Baseline DBP, Time-updated SBP, Time-updated DBP, Number of agents, ACEI/ARB use, CCB use, Diuretic use (at baseline and trial start)

**e. Risk of Chronic Kidney Disease Progression in Subgroups of Baseline Albuminuria or Proteinuria**

| Albuminuria / Proteinuria category | Follow-up SBP — mmHg | Adjusted HR (95% CI) | P value |
|------------------------------------|----------------------|----------------------|---------|
| Normal to mildly increased (A1)    | <110                 | 1.7 (0.71–4.05)      | 0.231   |
|                                    | 110-119              | 1                    | (ref)   |
|                                    | 120-129              | 1.5 (0.89–2.52)      | 0.129   |
|                                    | 130-139              | 0.82 (0.46–1.48)     | 0.514   |
|                                    | 140-149              | 1.02 (0.52–2.02)     | 0.944   |
|                                    | >150                 | 1.08 (0.47–2.46)     | 0.856   |
| Moderately increased (A2)          | <110                 | 1.03 (0.34–3.14)     | 0.956   |
|                                    | 110-119              | 1                    | (ref)   |
|                                    | 120-129              | 0.66 (0.34–1.29)     | 0.221   |
|                                    | 130-139              | 1.32 (0.7–2.5)       | 0.394   |
|                                    | 140-149              | 1.63 (0.79–3.36)     | 0.191   |
|                                    | >150                 | 1.67 (0.63–4.42)     | 0.304   |
| Severely increased (A3)            | <110                 | 1.6 (0.75–3.37)      | 0.222   |
|                                    | 110-119              | 1                    | (ref)   |
|                                    | 120-129              | 1.34 (0.89–2.02)     | 0.156   |
|                                    | 130-139              | 1.86 (1.23–2.82)     | 0.003   |
|                                    | 140-149              | 2.44 (1.56–3.84)     | <0.001  |
|                                    | >150                 | 3.62 (2.21–5.95)     | <0.001  |

Adjustments: Age, Female, Race, BMI, DM, CVD, Smoking status, Baseline GFR, Albuminuria/Proteinuria category, Baseline SBP, Baseline DBP, Time-updated SBP, Time-updated DBP, Number of agents, ACEI/ARB use, CCB use, Diuretic use (at baseline and trial start)



## V. GOAL BP AS MEAN OF ALL FOLLOW-UP BP READINGS

Description: BP intervention groups defined using mean of all follow-up BP readings

### a. Incidence of Renal Outcomes According to Follow-up Systolic Blood Pressure

| Follow-up SBP — mmHg | No. of patients | CKD progression — no. (%) | ≥ 50% reduction in GFR — no. (%) | ESRD or transplant — no. (%) |
|----------------------|-----------------|---------------------------|----------------------------------|------------------------------|
| <110                 | 148             | 13 (8.8%)                 | 13 (8.8%)                        | 6 (4.1%)                     |
| 110-119              | 873             | 65 (7.4%)                 | 53 (6.1%)                        | 35 (4.0%)                    |
| 120-129              | 1372            | 173 (12.6%)               | 140 (10.2%)                      | 96 (7.0%)                    |
| 130-139              | 1495            | 196 (13.1%)               | 152 (10.2%)                      | 131 (8.8%)                   |
| 140-149              | 783             | 154 (19.7%)               | 112 (14.3%)                      | 110 (14.0%)                  |
| ≥150                 | 330             | 112 (33.9%)               | 83 (25.2%)                       | 84 (25.5%)                   |
| Total                | 5001            | 713 (14.3%)               | 553 (11.1%)                      | 462 (9.2%)                   |

### b. Risk of Chronic Kidney Disease Progression According to Follow-up Systolic Blood Pressure

| Follow-up SBP — mmHg | Unadjusted HR (95% CI) | Adjusted HR (95% CI) | P value |
|----------------------|------------------------|----------------------|---------|
| <110                 | 1.05 (0.58–1.91)       | 1.76 (0.96–3.24)     | 0.068   |
| 110-119              | 1                      | 1                    | (ref)   |
| 120-129              | 1.82 (1.37–2.42)       | 1.4 (1.05–1.88)      | 0.024   |
| 130-139              | 1.92 (1.45–2.55)       | 1.69 (1.23–2.32)     | 0.001   |
| 140-149              | 3.01 (2.25–4.02)       | 1.93 (1.36–2.74)     | <0.001  |
| ≥150                 | 6.42 (4.73–8.72)       | 2.44 (1.59–3.75)     | <0.001  |

Adjustments: Age, Female, Race, BMI, DM, CVD, Smoking status, Baseline GFR, Albuminuria/Proteinuria category, Baseline SBP, Baseline DBP, Time-updated SBP, Time-updated DBP, Number of agents, ACEI/ARB use, CCB use, Diuretic use (at baseline and trial start)

### c. Risk of Chronic Kidney Disease Progression According to Baseline Albuminuria or Proteinuria

| Albuminuria / Proteinuria category | Unadjusted HR (95% CI) | Adjusted HR (95% CI) | P value |
|------------------------------------|------------------------|----------------------|---------|
| Normal to mildly increased (A1)    | 1                      | 1                    | (ref)   |
| Moderately increased (A2)          | 1.85 (1.46–2.34)       | 1.51 (1.17–1.93)     | 0.001   |
| Severely increased (A3)            | 11.43 (9.51–13.72)     | 3.09 (2.49–3.83)     | <0.001  |

Adjustments: Age, Female, Race, BMI, DM, CVD, Smoking status, Baseline GFR, Baseline SBP, Baseline DBP, Time-updated SBP, Time-updated DBP, Number of agents, ACEI/ARB use, CCB use, Diuretic use (at baseline and trial start)

**d. Interaction testing**

| Interaction                                         | P Value |
|-----------------------------------------------------|---------|
| Follow-up SBP*A2 (vs. A1) albuminuria / proteinuria | 0.022   |
| Follow-up SBP*A3 (vs. A1) albuminuria / proteinuria | 0.001   |

Adjustments: Age, Female, Race, BMI, DM, CVD, Smoking status, Baseline GFR, Albuminuria/proteinuria category, Follow-up SBP, Baseline SBP, Baseline DBP, Time-updated SBP, Time-updated DBP, Number of agents, ACEI/ARB use, CCB use, Diuretic use (at baseline and trial start)

**e. Risk of Chronic Kidney Disease Progression in Subgroups of Baseline Albuminuria or Proteinuria**

| Albuminuria / Proteinuria category | Follow-up SBP — mmHg | Adjusted HR (95% CI) | P value |
|------------------------------------|----------------------|----------------------|---------|
| Normal to mildly increased (A1)    | <110                 | 1.62 (0.6–4.42)      | 0.344   |
|                                    | 110-119              | 1                    | (ref)   |
|                                    | 120-129              | 1.25 (0.73–2.12)     | 0.418   |
|                                    | 130-139              | 0.85 (0.47–1.55)     | 0.602   |
|                                    | 140-149              | 0.63 (0.3–1.33)      | 0.225   |
|                                    | >150                 | 1.06 (0.45–2.53)     | 0.891   |
| Moderately increased (A2)          | <110                 | 1.49 (0.31–7.08)     | 0.62    |
|                                    | 110-119              | 1                    | (ref)   |
|                                    | 120-129              | 1.14 (0.57–2.29)     | 0.709   |
|                                    | 130-139              | 2.13 (1–4.56)        | 0.051   |
|                                    | 140-149              | 2.2 (0.95–5.09)      | 0.066   |
|                                    | >150                 | 1.75 (0.58–5.27)     | 0.319   |
| Severely increased (A3)            | <110                 | 1.95 (0.79–4.8)      | 0.147   |
|                                    | 110-119              | 1                    | (ref)   |
|                                    | 120-129              | 1.62 (1.06–2.47)     | 0.025   |
|                                    | 130-139              | 2.37 (1.52–3.7)      | <0.001  |
|                                    | 140-149              | 3.19 (1.96–5.19)     | <0.001  |
|                                    | >150                 | 4.31 (2.41–7.71)     | <0.001  |

Adjustments: Age, Female, Race, BMI, DM, CVD, Smoking status, Baseline GFR, Albuminuria/Proteinuria category, Baseline SBP, Baseline DBP, Time-updated SBP, Time-updated DBP, Number of agents, ACEI/ARB use, CCB use, Diuretic use (at baseline and trial start)
